# Supplementary material
Source: PubMed Central journal article supplement (PMC7821091)
Supplement: jamaoncol-e207320-s001.pdf [file jamaoncol-e207320-s001.pdf]

## Supplementary Online Content

Hoskins KF, Danciu OC, Ko NY, Calip GS. Association of race/ethnicity and the 21-gene recurrence score with breast cancer-specific mortality among US women. *JAMA Oncol*. Published online January 21, 2021. doi:10.1001/jamaoncol.2020.7320

**eFigure 1.** CONSORT Diagram

**eTable 1.** Characteristics of Study Participants

**eTable 2.** Treatment of Node-Negative Participants

**eTable 3.** Sensitivity Analysis of Breast Cancer-Specific Mortality According to the Recurrence Score and Race/Ethnicity, Restricted to Node-Negative Tumors That Are ER-Positive and HER2-Negative

**eTable 4.** Risk of Breast Cancer-Specific Mortality Among Node-Positive Patients, According to the Recurrence Score and Race/Ethnicity

**eTable 5.** Performance of the Recurrence Score in Axillary Lymph Node-Negative Patients by Race/Ethnicity

**eReference**

This supplementary material has been provided by the authors to give readers additional information about their work.

**eFigure 1.** CONSORT diagram of study cohort selection

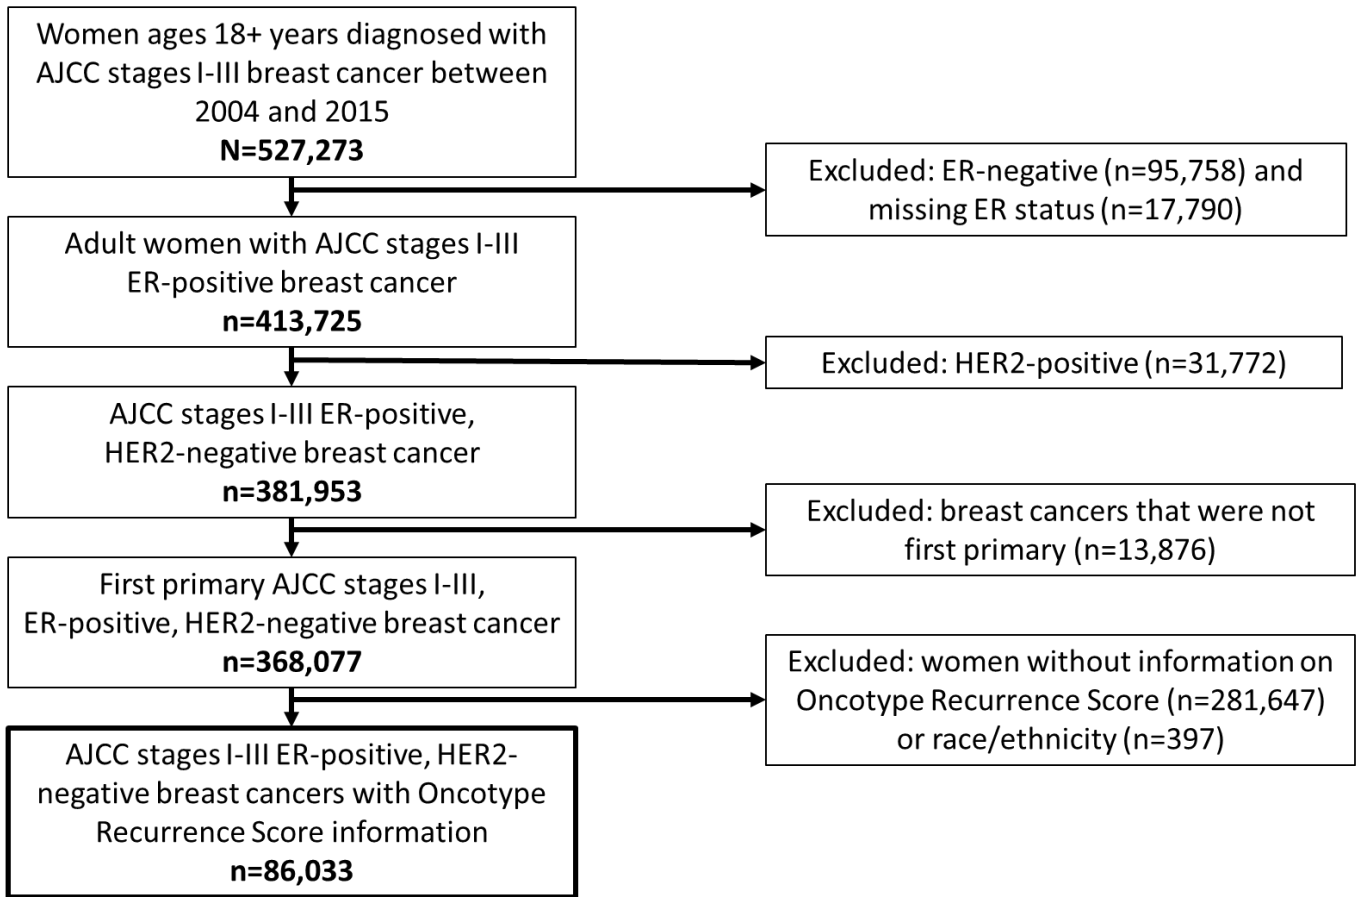

**eTable 1.** Characteristics of study participants

|                                        | <b>Recurrence<br/>Score 0-10<br/>(n=18,214)</b> |         | <b>Recurrence<br/>Score 11-25<br/>(n=56,050)</b> |         | <b>Recurrence<br/>Score &gt;25<br/>(n=12,166)</b> |         | <b>P<sup>a</sup></b> |
|----------------------------------------|-------------------------------------------------|---------|--------------------------------------------------|---------|---------------------------------------------------|---------|----------------------|
|                                        | n                                               | (%)     | n                                                | (%)     | n                                                 | (%)     |                      |
| <b>Age, years</b>                      |                                                 |         |                                                  |         |                                                   |         |                      |
| Median (interquartile range)           | 60                                              | (51-67) | 57                                               | (49-65) | 58                                                | (50-65) | <0.01                |
| 18-39                                  | 398                                             | (13.2)  | 1,987                                            | (66.1)  | 620                                               | (20.6)  | <0.01                |
| 40-49                                  | 3,211                                           | (17.7)  | 12,737                                           | (70.0)  | 2,249                                             | (12.4)  |                      |
| 50-59                                  | 5,106                                           | (19.3)  | 17,543                                           | (66.4)  | 3,774                                             | (14.3)  |                      |
| 60-69                                  | 6,351                                           | (23.6)  | 16,718                                           | (62.1)  | 3,864                                             | (14.4)  |                      |
| 70-79                                  | 2,831                                           | (26.4)  | 6,390                                            | (59.7)  | 1,489                                             | (13.9)  |                      |
| 80+                                    | 317                                             | (27.3)  | 675                                              | (58.1)  | 170                                               | (14.6)  |                      |
| <b>Race/ethnicity</b>                  |                                                 |         |                                                  |         |                                                   |         |                      |
| Non-Hispanic White                     | 13,403                                          | (20.9)  | 41,912                                           | (65.4)  | 8,754                                             | (13.7)  | <0.01                |
| Non-Hispanic Black                     | 1,410                                           | (21.0)  | 4,118                                            | (61.3)  | 1,191                                             | (17.7)  |                      |
| American Indian / Alaskan Native       | 64                                              | (18.2)  | 226                                              | (64.4)  | 61                                                | (17.4)  |                      |
| Asian / Pacific Islander               | 1,525                                           | (21.9)  | 4,408                                            | (63.4)  | 1,017                                             | (14.6)  |                      |
| Hispanic                               | 1,731                                           | (21.8)  | 5,120                                            | (64.5)  | 1,093                                             | (13.8)  |                      |
| <b>Year of breast cancer diagnosis</b> |                                                 |         |                                                  |         |                                                   |         |                      |
| 2004-2007                              | 1,415                                           | (14.7)  | 6,563                                            | (68.3)  | 1,634                                             | (17.0)  | <0.01                |
| 2008-2011                              | 6,184                                           | (19.3)  | 21,133                                           | (65.8)  | 4,803                                             | (15.0)  |                      |
| 2012-2015                              | 10,615                                          | (23.8)  | 28,354                                           | (63.4)  | 5,729                                             | (12.8)  |                      |
| <b>AJCC stage</b>                      |                                                 |         |                                                  |         |                                                   |         |                      |
| I                                      | 12,005                                          | (21.2)  | 37,287                                           | (65.9)  | 7,258                                             | (12.8)  | <0.01                |
| II                                     | 6,010                                           | (20.9)  | 18,068                                           | (62.8)  | 4,699                                             | (16.3)  |                      |
| III                                    | 199                                             | (18.0)  | 695                                              | (63.0)  | 209                                               | (19.0)  |                      |
| <b>Tumor size, cm</b>                  |                                                 |         |                                                  |         |                                                   |         |                      |
| <2                                     | 13,715                                          | (21.4)  | 42,295                                           | (66.0)  | 8,032                                             | (12.5)  | <0.01                |
| 2-5                                    | 4,151                                           | (20.0)  | 12,725                                           | (61.2)  | 3,904                                             | (18.8)  |                      |
| >5                                     | 347                                             | (21.6)  | 1,029                                            | (64.1)  | 230                                               | (14.3)  |                      |
| <b>Number positive axillary nodes</b>  |                                                 |         |                                                  |         |                                                   |         |                      |
| 0                                      | 15,524                                          | (21.0)  | 47,945                                           | (64.8)  | 10,533                                            | (14.2)  | <0.01                |
| 1-3                                    | 2,599                                           | (21.9)  | 7,756                                            | (65.4)  | 1,504                                             | (12.7)  |                      |
| 4-9                                    | 66                                              | (15.9)  | 257                                              | (61.8)  | 93                                                | (22.4)  |                      |
| 10+                                    | 25                                              | (16.5)  | 92                                               | (60.5)  | 35                                                | (23.0)  |                      |
| <b>Grade</b>                           |                                                 |         |                                                  |         |                                                   |         |                      |
| 1                                      | 6,667                                           | (27.0)  | 17,002                                           | (68.9)  | 1,018                                             | (4.1)   | <0.01                |
| 2                                      | 9,897                                           | (21.4)  | 30,979                                           | (67.1)  | 5,314                                             | (11.5)  |                      |
| 3                                      | 1,208                                           | (8.9)   | 6,706                                            | (49.6)  | 5,607                                             | (41.5)  |                      |
| Unknown                                | 426                                             |         | 1,312                                            |         | 181                                               |         |                      |
| <b>Progesterone receptor status</b>    |                                                 |         |                                                  |         |                                                   |         |                      |
| Negative                               | 264                                             | (3.4)   | 4,376                                            | (55.9)  | 3,191                                             | (40.8)  | <0.01                |
| Positive                               | 17,920                                          | (22.8)  | 51,572                                           | (65.7)  | 8,952                                             | (11.4)  |                      |
| Unknown                                | 30                                              |         | 102                                              |         | 23                                                |         |                      |
| <b>Surgery</b>                         |                                                 |         |                                                  |         |                                                   |         |                      |
| None                                   | 106                                             | (21.4)  | 306                                              | (61.7)  | 84                                                | (16.9)  | <0.01                |
| Breast-conserving surgery              | 12,193                                          | (20.5)  | 39,122                                           | (65.7)  | 8,227                                             | (13.8)  |                      |
| Mastectomy                             | 5,901                                           | (22.4)  | 16,576                                           | (63.0)  | 3,842                                             | (14.6)  |                      |
| Unknown                                | 14                                              |         | 46                                               |         | 13                                                |         |                      |
| <b>Radiation</b>                       |                                                 |         |                                                  |         |                                                   |         |                      |
| None                                   | 6,989                                           | (21.6)  | 20,332                                           | (63.0)  | 4,974                                             | (15.4)  | <0.01                |
| Any                                    | 10,931                                          | (20.9)  | 34,626                                           | (66.2)  | 6,760                                             | (12.9)  |                      |
| Unknown                                | 294                                             |         | 1,092                                            |         | 432                                               |         |                      |
| <b>Chemotherapy</b>                    |                                                 |         |                                                  |         |                                                   |         |                      |
| No/unknown                             | 17,340                                          | (25.7)  | 45,975                                           | (68.1)  | 4,155                                             | (6.2)   | <0.01                |
| Any                                    | 874                                             | (4.6)   | 10,075                                           | (53.1)  | 8,011                                             | (42.3)  |                      |

**eTable 2.** Treatment of node-negative participants

|                     | Non-Hispanic White (n=54,945) |        | Non-Hispanic Black (n=5,967) |        | American Indian / Alaskan Native (n=295) |        | Asian / Pacific Islander (n=6,034) |        | Hispanic (n=6,688) |        | P     |
|---------------------|-------------------------------|--------|------------------------------|--------|------------------------------------------|--------|------------------------------------|--------|--------------------|--------|-------|
|                     | n                             | (%)    | n                            | (%)    | n                                        | (%)    | n                                  | (%)    | n                  | (%)    |       |
| <b>All women</b>    |                               |        |                              |        |                                          |        |                                    |        |                    |        |       |
| <b>Surgery</b>      |                               |        |                              |        |                                          |        |                                    |        |                    |        |       |
| None                | 267                           | (0.5)  | 40                           | (0.7)  | 2                                        | (0.7)  | 34                                 | (0.6)  | 58                 | (0.9)  | <0.01 |
| Breast-conserving   | 39,179                        | (71.3) | 4,014                        | (67.3) | 193                                      | (65.4) | 3,882                              | (64.3) | 4,631              | (69.2) |       |
| Mastectomy          | 15,450                        | (28.1) | 1,638                        | (27.5) | 100                                      | (33.9) | 2,114                              | (35.0) | 1,994              | (29.8) |       |
| <b>Radiation</b>    |                               |        |                              |        |                                          |        |                                    |        |                    |        |       |
| None                | 19,824                        | (36.1) | 2,120                        | (35.5) | 125                                      | (42.4) | 2,597                              | (43.0) | 2,782              | (41.6) | <0.01 |
| Any                 | 34,182                        | (62.2) | 3,442                        | (57.7) | 167                                      | (56.6) | 3,332                              | (55.2) | 3,721              | (55.6) |       |
| Unknown             | 939                           | (1.7)  | 135                          | (2.3)  | 3                                        | (1.0)  | 105                                | (1.7)  | 185                | (2.8)  |       |
| <b>Chemotherapy</b> |                               |        |                              |        |                                          |        |                                    |        |                    |        |       |
| None/unknown        | 44,433                        | (80.9) | 4,418                        | (74.0) | 230                                      | (78.0) | 4,775                              | (79.1) | 5,330              | (79.7) | <0.01 |
| Any                 | 10,512                        | (19.1) | 1,279                        | (21.4) | 65                                       | (22.0) | 1,259                              | (20.9) | 1,358              | (20.3) |       |
| <b>RS 0-10</b>      |                               |        |                              |        |                                          |        |                                    |        |                    |        |       |
| <b>Surgery</b>      |                               |        |                              |        |                                          |        |                                    |        |                    |        |       |
| None                | 53                            | (0.5)  | 12                           | (1.0)  | 2                                        | (3.4)  | 7                                  | (0.5)  | 13                 | (0.9)  | <0.01 |
| Breast-conserving   | 7,984                         | (69.7) | 812                          | (68.1) | 37                                       | (62.7) | 819                                | (62.1) | 951                | (66.3) |       |
| Mastectomy          | 3,406                         | (29.7) | 367                          | (30.8) | 20                                       | (33.9) | 491                                | (37.3) | 469                | (32.7) |       |
| <b>Radiation</b>    |                               |        |                              |        |                                          |        |                                    |        |                    |        |       |
| None                | 4,209                         | (36.8) | 479                          | (40.2) | 27                                       | (45.8) | 594                                | (45.1) | 601                | (41.9) | <0.01 |
| Any                 | 7,102                         | (62.0) | 690                          | (57.9) | 32                                       | (54.2) | 710                                | (53.9) | 796                | (55.5) |       |
| Unknown             | 142                           | (1.2)  | 23                           | (1.9)  | 0                                        | (0.0)  | 14                                 | (1.1)  | 37                 | (2.6)  |       |
| <b>Chemotherapy</b> |                               |        |                              |        |                                          |        |                                    |        |                    |        |       |
| None/unknown        | 11,191                        | (97.7) | 1,153                        | (96.7) | 57                                       | (96.6) | 1,278                              | (97.0) | 1,385              | (96.6) | 0.04  |
| Any                 | 262                           | (2.3)  | 39                           | (3.3)  | 2                                        | (3.4)  | 40                                 | (3.0)  | 49                 | (3.4)  |       |
| <b>RS 11-25</b>     |                               |        |                              |        |                                          |        |                                    |        |                    |        |       |
| <b>Surgery</b>      |                               |        |                              |        |                                          |        |                                    |        |                    |        |       |
| None                | 180                           | (0.5)  | 18                           | (0.5)  | 0                                        | (0.0)  | 21                                 | (0.5)  | 38                 | (0.9)  | <0.01 |
| Breast-conserving   | 25861                         | (72.1) | 2490                         | (71.2) | 127                                      | (68.6) | 2511                               | (65.6) | 3022               | (70.0) |       |
| Mastectomy          | 9816                          | (27.4) | 987                          | (28.2) | 58                                       | (31.4) | 1295                               | (33.8) | 1251               | (29.0) |       |
| <b>Radiation</b>    |                               |        |                              |        |                                          |        |                                    |        |                    |        |       |
| None                | 12601                         | (35.1) | 1227                         | (35.1) | 70                                       | (37.8) | 1598                               | (41.7) | 1755               | (40.7) | <0.01 |
| Any                 | 22730                         | (63.3) | 2199                         | (62.9) | 113                                      | (61.1) | 2168                               | (56.6) | 2452               | (56.8) |       |
| Unknown             | 555                           | (1.5)  | 72                           | (2.1)  | 2                                        | (1.1)  | 64                                 | (1.7)  | 108                | (2.5)  |       |
| <b>Chemotherapy</b> |                               |        |                              |        |                                          |        |                                    |        |                    |        |       |
| None/unknown        | 30543                         | (85.1) | 2915                         | (83.3) | 156                                      | (84.3) | 3185                               | (83.2) | 3603               | (83.5) | <0.01 |
| Any                 | 5343                          | (14.9) | 583                          | (16.7) | 29                                       | (15.7) | 645                                | (16.8) | 712                | (16.5) |       |
| <b>RS &gt;25</b>    |                               |        |                              |        |                                          |        |                                    |        |                    |        |       |
| <b>Surgery</b>      |                               |        |                              |        |                                          |        |                                    |        |                    |        |       |
| None                | 34                            | (0.4)  | 10                           | (1.0)  | 0                                        | (0.0)  | 6                                  | (0.7)  | 7                  | (0.7)  | <0.01 |
| Breast-conserving   | 5334                          | (70.1) | 712                          | (70.7) | 29                                       | (56.9) | 552                                | (62.3) | 658                | (70.1) |       |
| Mastectomy          | 2228                          | (29.3) | 284                          | (28.2) | 22                                       | (43.1) | 328                                | (37.0) | 274                | (29.2) |       |
| <b>Radiation</b>    |                               |        |                              |        |                                          |        |                                    |        |                    |        |       |
| None                | 3014                          | (39.6) | 414                          | (41.1) | 28                                       | (54.9) | 405                                | (45.7) | 426                | (45.4) | <0.01 |
| Any                 | 4350                          | (57.2) | 553                          | (54.9) | 22                                       | (43.1) | 454                                | (51.2) | 473                | (50.4) |       |
| Unknown             | 242                           | (3.2)  | 40                           | (4.0)  | 1                                        | (2.0)  | 27                                 | (3.0)  | 40                 | (4.3)  |       |
| <b>Chemotherapy</b> |                               |        |                              |        |                                          |        |                                    |        |                    |        |       |
| None/unknown        | 2699                          | (35.5) | 350                          | (34.8) | 17                                       | (33.3) | 312                                | (35.2) | 342                | (36.4) | 0.22  |
| Any                 | 4907                          | (64.5) | 657                          | (65.2) | 34                                       | (66.7) | 574                                | (64.8) | 597                | (63.6) |       |

Abbreviations: RS, Recurrence Score

\*To compare differences between groups we used chi-squared test (Fisher's exact test with cell frequencies <5)

**eTable 3.** Sensitivity Analysis: Risk of breast cancer-specific mortality according to the Recurrence Score and race/ethnicity restricted to node-negative tumors that are ER-positive and HER2-negative<sup>a</sup>

|                                               | N      | Breast cancer deaths | Age-adjusted model |               | Multivariable model <sup>b</sup> |               |
|-----------------------------------------------|--------|----------------------|--------------------|---------------|----------------------------------|---------------|
|                                               |        |                      | SHR                | (95% CI)      | SHR                              | (95% CI)      |
| <b>All women, node-negative</b>               |        |                      |                    |               |                                  |               |
| Non-Hispanic white                            | 37,562 | 303                  | 1.00               | Reference     | 1.00                             | Reference     |
| Non-Hispanic black                            | 4,141  | 58                   | 1.93               | (1.46, 2.56)  | 1.72                             | (1.29, 2.31)  |
| American Indian / Alaskan Native              | 226    | 3                    | 1.82               | (0.58, 5.67)  | 1.69                             | (0.54, 5.27)  |
| Asian / Pacific Islander                      | 4,404  | 15                   | 0.52               | (0.31, 0.88)  | 0.48                             | (0.29, 0.82)  |
| Hispanic                                      | 5,003  | 32                   | 0.99               | (0.69, 1.43)  | 0.92                             | (0.64, 1.34)  |
| <b>Recurrence Score 0-10, node-negative</b>   |        |                      |                    |               |                                  |               |
| Non-Hispanic white                            | 8,483  | 32                   | 1.00               | Reference     | 1.00                             | Reference     |
| Non-Hispanic black                            | 909    | 9                    | 2.75               | (1.31, 5.77)  | 3.04                             | (1.43, 6.48)  |
| American Indian / Alaskan Native              | 46     | 1                    | 7.77               | (1.06, 56.94) | 8.96                             | (1.22, 65.99) |
| Asian / Pacific Islander                      | 1,041  | 0                    | -                  | -             | -                                | -             |
| Hispanic                                      | 1,150  | 4                    | 1.36               | (0.48, 3.87)  | 1.11                             | (0.33, 3.69)  |
| <b>Recurrence Score 11-25, node-negative</b>  |        |                      |                    |               |                                  |               |
| Non-Hispanic white                            | 24,213 | 139                  | 1.00               | Reference     | 1.00                             | Reference     |
| Non-Hispanic black                            | 2,546  | 25                   | 1.90               | (1.24, 2.92)  | 1.62                             | (1.03, 2.56)  |
| American Indian / Alaskan Native              | 143    | 2                    | 2.69               | (0.67, 10.88) | 2.81                             | (0.69, 11.38) |
| Asian / Pacific Islander                      | 2,752  | 5                    | 0.42               | (0.17, 1.04)  | 0.40                             | (0.16, 0.98)  |
| Hispanic                                      | 3,195  | 13                   | 0.89               | (0.50, 1.57)  | 0.83                             | (0.47, 1.46)  |
| <b>Recurrence Score &gt;25, node-negative</b> |        |                      |                    |               |                                  |               |
| Non-Hispanic white                            | 4,866  | 132                  | 1.00               | Reference     | 1.00                             | Reference     |
| Non-Hispanic black                            | 686    | 24                   | 1.47               | (0.95, 2.28)  | 1.44                             | (0.92, 2.26)  |
| American Indian / Alaskan Native              | 37     | 0                    | -                  | -             | -                                | -             |
| Asian / Pacific Islander                      | 611    | 10                   | 0.63               | (0.33, 1.20)  | 0.58                             | (0.30, 1.10)  |
| Hispanic                                      | 658    | 15                   | 1.01               | (0.59, 1.73)  | 0.99                             | (0.58, 1.69)  |

Abbreviations: SHR, subdistribution hazard ratio.

<sup>a</sup>Restricted to cases diagnosed between 2010-2015.

<sup>b</sup>Multivariable Fine-Gray model with robust standard errors adjusted for age, year of diagnosis, tumor size, progesterone receptor status, type of surgery, and administration of radiation and chemotherapy.

**eTable 4.** Risk of breast cancer-specific mortality among node-positive patients, according to the Recurrence Score and race/ethnicity

|                                  | N     | Breast cancer deaths | Age-adjusted model |               | Multivariable-adjusted model <sup>a</sup> |               |
|----------------------------------|-------|----------------------|--------------------|---------------|-------------------------------------------|---------------|
|                                  |       |                      | SHR                | (95% CI)      | SHR                                       | (95% CI)      |
| <b>All node-positive</b>         |       |                      |                    |               |                                           |               |
| Non-Hispanic White               | 9,124 | 220                  | 1.00               | Reference     | 1.00                                      | Reference     |
| Non-Hispanic Black               | 1,022 | 32                   | 1.60               | (1.10, 2.32)  | 1.31                                      | (0.88, 1.93)  |
| American Indian / Alaskan Native | 56    | 2                    | 1.65               | (0.41, 6.66)  | 1.61                                      | (0.40, 6.51)  |
| Asian / Pacific Islander         | 916   | 13                   | 0.84               | (0.48, 1.47)  | 0.84                                      | (0.54, 0.91)  |
| Hispanic                         | 1,256 | 27                   | 1.19               | (0.80, 1.78)  | 1.11                                      | (0.74, 1.68)  |
| <b>Recurrence Score 0-10</b>     |       |                      |                    |               |                                           |               |
| Non-Hispanic White               | 1,950 | 22                   | 1.00               | Reference     | 1.00                                      | Reference     |
| Non-Hispanic Black               | 218   | 1                    | 0.54               | (0.07, 4.03)  | 0.43                                      | (0.06, 3.30)  |
| American Indian / Alaskan Native | 5     | 0                    | -                  | -             | -                                         | -             |
| Asian / Pacific Islander         | 207   | 0                    | -                  | -             | -                                         | -             |
| Hispanic                         | 297   | 2                    | 0.80               | (0.19, 1.12)  | 0.76                                      | (0.18, 3.25)  |
| <b>Recurrence Score 11-25</b>    |       |                      |                    |               |                                           |               |
| Non-Hispanic White               | 6,026 | 104                  | 1.00               | Reference     | 1.00                                      | Reference     |
| Non-Hispanic Black               | 620   | 17                   | 1.95               | (1.17, 3.26)  | 1.96                                      | (1.16, 3.30)  |
| American Indian / Alaskan Native | 41    | 2                    | 2.95               | (0.73, 11.98) | 3.07                                      | (0.75, 12.52) |
| Asian / Pacific Islander         | 578   | 6                    | 0.93               | (0.41, 2.12)  | 0.93                                      | (0.41, 2.14)  |
| Hispanic                         | 805   | 13                   | 1.28               | (0.72, 2.29)  | 1.21                                      | (0.67, 2.15)  |
| <b>Recurrence Score &gt;25</b>   |       |                      |                    |               |                                           |               |
| Non-Hispanic White               | 1,148 | 94                   | 1.00               | Reference     | 1.00                                      | Reference     |
| Non-Hispanic Black               | 184   | 14                   | 1.17               | (0.67, 2.05)  | 0.89                                      | (0.48, 1.68)  |
| American Indian / Alaskan Native | 10    | 0                    | -                  | -             | -                                         | -             |
| Asian / Pacific Islander         | 131   | 7                    | 0.91               | (0.42, 1.97)  | 0.85                                      | (0.39, 1.87)  |
| Hispanic                         | 154   | 12                   | 1.36               | (0.74, 2.49)  | 1.30                                      | (0.69, 2.46)  |

Abbreviations: SHR, subdistribution hazard ratio.

<sup>a</sup>Multivariable Fine-Gray model with robust standard errors adjusted for age, year of diagnosis, tumor size, progesterone receptor status, type of surgery, and administration of radiation and chemotherapy.

**eTable 5.** Performance of the Recurrence Score in axillary lymph node-negative patients, by race/ethnicity

|                                         | N      | Breast cancer deaths | Age-adjusted model |               | Multivariable model <sup>a</sup> |               | C-index <sup>b</sup> (95% CI) |                                                                        |
|-----------------------------------------|--------|----------------------|--------------------|---------------|----------------------------------|---------------|-------------------------------|------------------------------------------------------------------------|
|                                         |        |                      | SHR                | (95% CI)      | SHR                              | (95% CI)      |                               |                                                                        |
| <b>All women, node-negative</b>         |        |                      |                    |               |                                  |               |                               |                                                                        |
| RS                                      |        |                      |                    |               |                                  |               |                               |                                                                        |
| 0-10                                    | 15,524 | 90                   | 1.00               | Reference     | 1.00                             | Reference     | 0.660                         | (0.642, 0.678)                                                         |
| 11-25                                   | 47,945 | 516                  | 1.70               | (1.35, 2.12)  | 1.78                             | (1.43, 2.16)  |                               |                                                                        |
| >25                                     | 10,533 | 430                  | 6.09               | (4.85, 7.64)  | 5.76                             | (4.46, 7.44)  |                               |                                                                        |
| <i>Per 10-unit increase in the RS</i>   |        |                      | 1.82               | (1.73, 1.91)  | 1.73                             | (1.63, 1.83)  | 0.697                         | (0.677, 0.717)                                                         |
| <b>Non-Hispanic White</b>               |        |                      |                    |               |                                  |               |                               |                                                                        |
| RS                                      |        |                      |                    |               |                                  |               |                               |                                                                        |
| 0-10                                    | 11,453 | 65                   | 1.00               | Reference     | 1.00                             | Reference     | 0.660                         | (0.640, 0.681)                                                         |
| 11-25                                   | 35,886 | 402                  | 1.81               | (1.39, 2.35)  | 1.87                             | (1.42, 2.46)  |                               |                                                                        |
| >25                                     | 7,606  | 315                  | 6.29               | (4.82, 8.35)  | 5.79                             | (4.29, 7.82)  |                               |                                                                        |
| <i>Per 10-unit increase in the RS</i>   |        |                      | 1.80               | (1.70, 1.91)  | 1.71                             | (1.60, 1.83)  | 0.700                         | (0.677, 0.722)                                                         |
| <b>Non-Hispanic Black</b>               |        |                      |                    |               |                                  |               |                               |                                                                        |
| RS                                      |        |                      |                    |               |                                  |               |                               |                                                                        |
| 0-10                                    | 1,192  | 15                   | 1.00               | Reference     | 1.00                             | Reference     | 0.627                         | (0.573, 0.682); P< 0.001 <sup>c</sup>                                  |
| 11-25                                   | 3,498  | 58                   | 1.22               | (0.69, 2.17)  | 1.24                             | (0.69, 2.23)  | Diff: -0.033                  | (-0.067, 0.001)                                                        |
| >25                                     | 1,007  | 53                   | 3.94               | (2.21, 7.00)  | 3.48                             | (1.83, 6.63)  |                               |                                                                        |
| <i>Per 10-unit increase in the RS</i>   |        |                      | 1.63               | (1.43, 1.85)  | 1.58                             | (1.35, 1.84)  | 0.656                         | (0.592, 0.720); P < 0.01 <sup>c</sup><br>Diff: -0.044 (-0.085, -0.002) |
| <b>American Indian / Alaskan Native</b> |        |                      |                    |               |                                  |               |                               |                                                                        |
| RS                                      |        |                      |                    |               |                                  |               |                               |                                                                        |
| 0-10                                    | 59     | 1                    | 1.00               | Reference     | 1.00                             | Reference     | 0.576                         | (0.321, 0.831); P<0.01 <sup>c</sup>                                    |
| 11-25                                   | 185    | 2                    | 0.66               | (0.06, 7.29)  | 0.30                             | (0.02, 4.46)  | Diff: -0.084                  | (-0.319, 0.150)                                                        |
| >25                                     | 51     | 2                    | 2.21               | (0.20, 24.52) | 0.37                             | (0.02, 7.00)  |                               |                                                                        |
| <i>Per 10-unit increase in the RS</i>   |        |                      | 2.36               | (1.31, 4.27)  | 1.74                             | (0.74, 4.11)  | 0.701                         | (0.429, 0.975); P=0.968 <sup>c</sup><br>Diff: 0.001 (-0.248, 0.253)    |
| <b>Asian / Pacific Islander</b>         |        |                      |                    |               |                                  |               |                               |                                                                        |
| RS                                      |        |                      |                    |               |                                  |               |                               |                                                                        |
| 0-10                                    | 1,318  | 1                    | 1.00               | Reference     | 1.00                             | Reference     | 0.740                         | (0.675, 0.806); P<0.001 <sup>c</sup>                                   |
| 11-25                                   | 3,830  | 23                   | 7.05               | (0.95, 52.32) | 0.42                             | (0.04, 4.92)  | Diff: 0.080                   | (0.035, 0.125)                                                         |
| >25                                     | 885    | 26                   | 29.90              | (4.06, 220.5) | 2.66                             | (0.21, 34.19) |                               |                                                                        |
| <i>Per 10-unit increase in the RS</i>   |        |                      | 2.10               | (1.69, 2.60)  | 2.04                             | (1.61, 2.59)  | 0.784                         | (0.720, 0.847); P<0.001 <sup>c</sup><br>Diff: 0.084 (0.043, 0.125)     |
| <b>Hispanic</b>                         |        |                      |                    |               |                                  |               |                               |                                                                        |
| RS                                      |        |                      |                    |               |                                  |               |                               |                                                                        |
| 0-10                                    | 1,434  | 8                    | 1.00               | Reference     | 1.00                             | Reference     | 0.667                         | (0.597, 0.737); P=0.254 <sup>c</sup>                                   |
| 11-25                                   | 4,315  | 31                   | 1.19               | (0.54, 2.58)  | -                                | -             | Diff: 0.007                   | (-0.043, 0.056)                                                        |
| >25                                     | 939    | 34                   | 5.58               | (2.58, 12.07) | -                                | -             |                               |                                                                        |
| <i>Per 10-unit increase in the RS</i>   |        |                      | 2.03               | (1.69, 2.43)  | 2.29                             | (1.85, 2.84)  | 0.678                         | (0.594, 0.761); P<0.001 <sup>c</sup><br>Diff: -0.022 (-0.083, 0.039)   |

Abbreviations: RS, Recurrence Score; SHR, subdistribution hazard ratio; Diff, difference in the C-index between indicated racial/ethnic group and non-Hispanic White.

<sup>a</sup>Multivariable Fine-Gray model with robust standard errors adjusted for age, year of diagnosis, tumor size, progesterone receptor status, type of surgery, and administration of radiation and chemotherapy.

<sup>b</sup>C-index estimated from rank parameter Harrell's C with symmetric 95% confidence intervals for the crude hazard ratio.

<sup>c</sup>Pairwise comparisons of C-indexes<sup>1</sup> were performed with a reference group of non-Hispanic white.

## eReference

1. Kang L, Chen W, Petrick NA, Gallas BD. Comparing two correlated C indices with right-censored survival outcome: a one-shot nonparametric approach. *Statistics in medicine*. 2015;34(4):685-703.
